# Supplementary material for: Chemotactic network responses to live bacteria show independence of phagocytosis from chemoreceptor sensing
Source: eLife journal article supplement (doi:10.7554/elife.24627), 2017-05-25
Supplement: supp [file elife-24627-supp-v1.zip]

Archive with 9 entries (9 files):
- elife_poa_e24627_Figure_4_Figure_Supplement_1.pdf
- elife_poa_e24627_Figure_6_Figure_Supplement_2.pdf
- elife_poa_e24627_Figure_9_Figure_Supplement_2.pdf
- elife_poa_e24627_Figure_9_Figure_Supplement_1.pdf
- elife_poa_e24627_Figure_6_Figure_Supplement_1.pdf
- elife_poa_e24627_Figure_1_Figure_supplement_1.pdf
- elife_poa_e24627_Figure_4_Figure_Supplement_2.pdf
- elife_poa_e24627_Movie_1.mp4
- elife_poa_e24627_Movie_2.mp4
