# Supplementary figures and images for: Chemotactic network responses to live bacteria show independence of phagocytosis from chemoreceptor sensing
Source: eLife journal article supplement (doi:10.7554/elife.24627), 2017-05-25

**A.**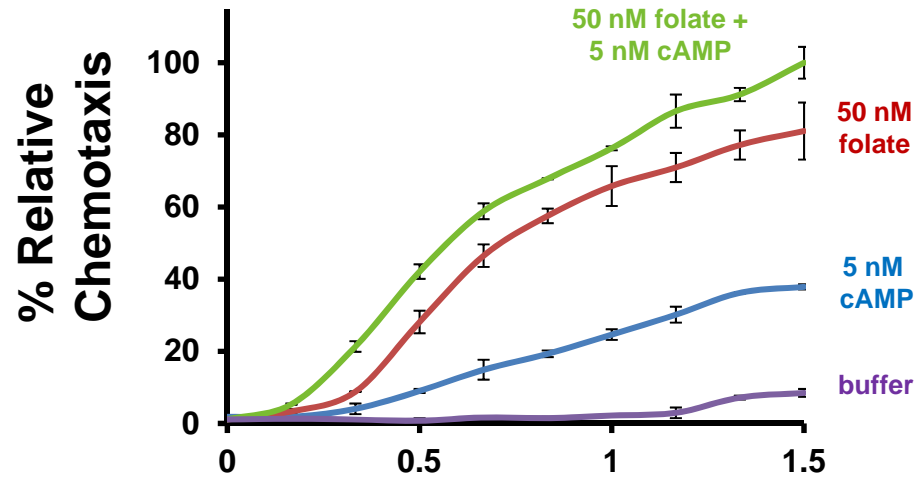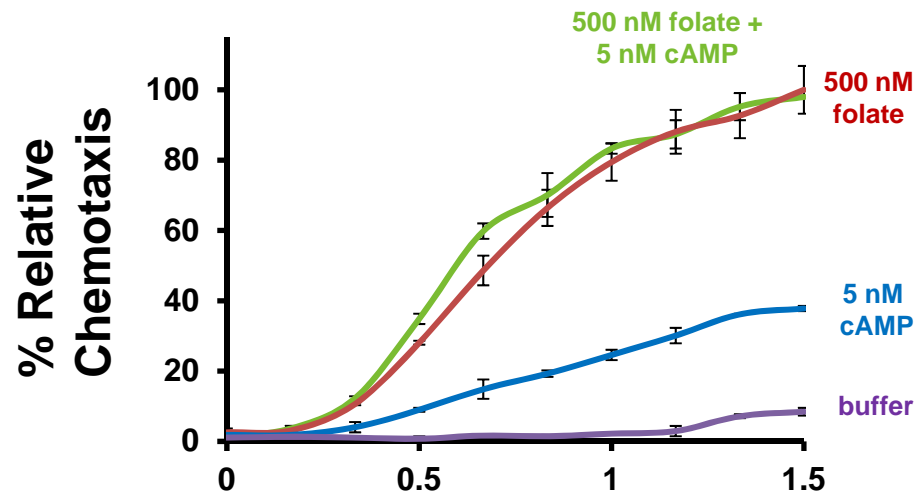**B.**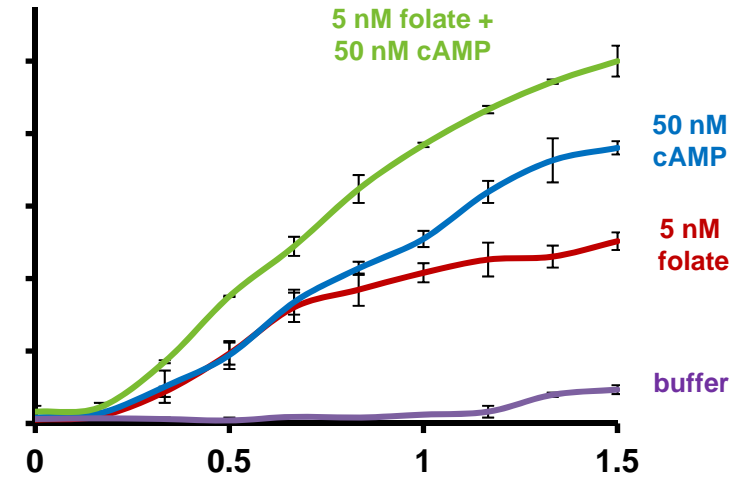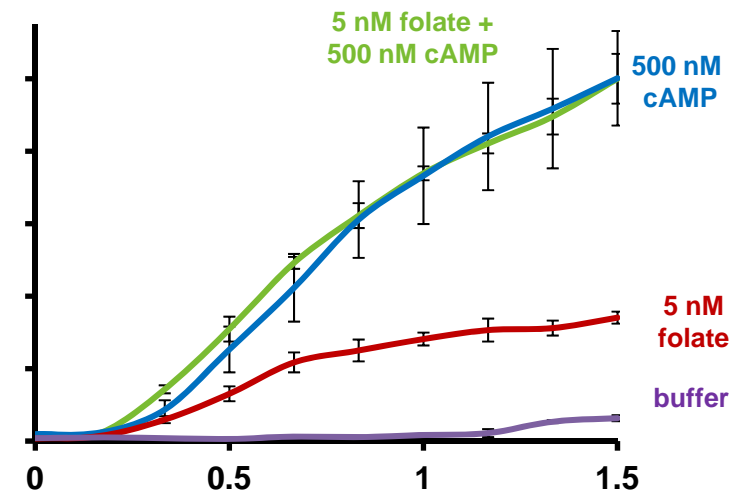**Time (Hrs)****Figure 4 - Figure Supplement 1**

Supplement: supp [file elife-24627-supp-v1.zip › elife_poa_e24627_Figure_4_Figure_Supplement_1.pdf]

## cAMP Stimulation; Growing WT

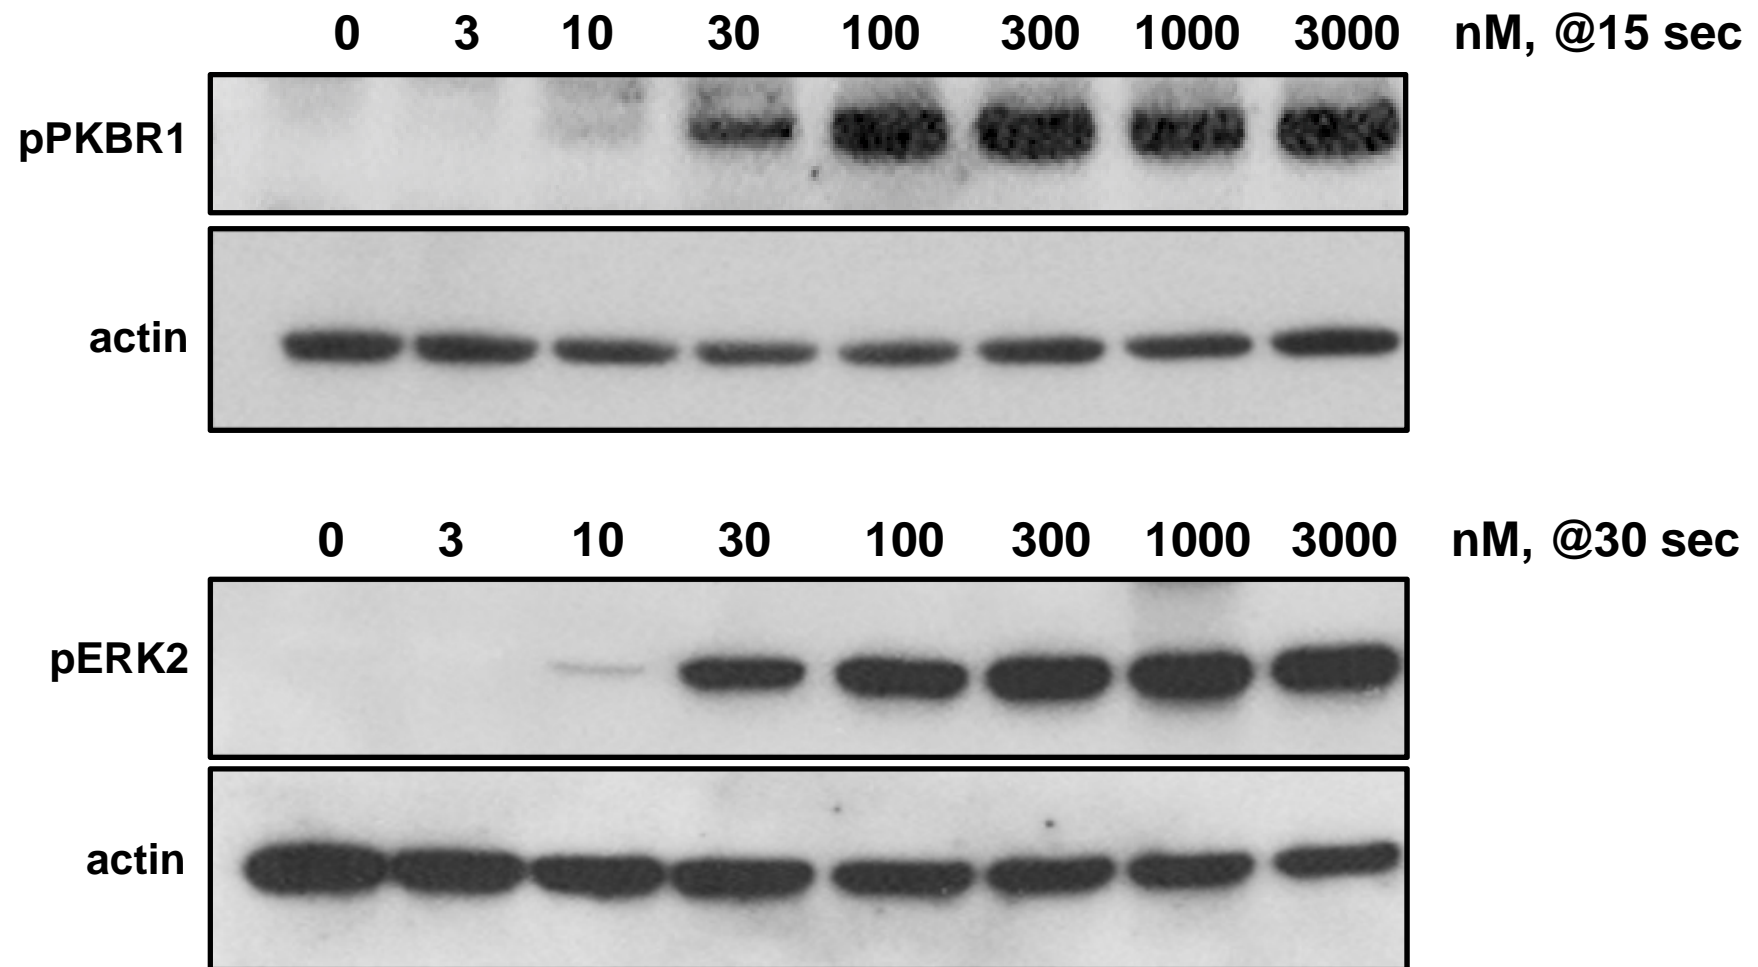

Figure 6 - Figure Supplement 2

Supplement: supp [file elife-24627-supp-v1.zip › elife_poa_e24627_Figure_6_Figure_Supplement_2.pdf]

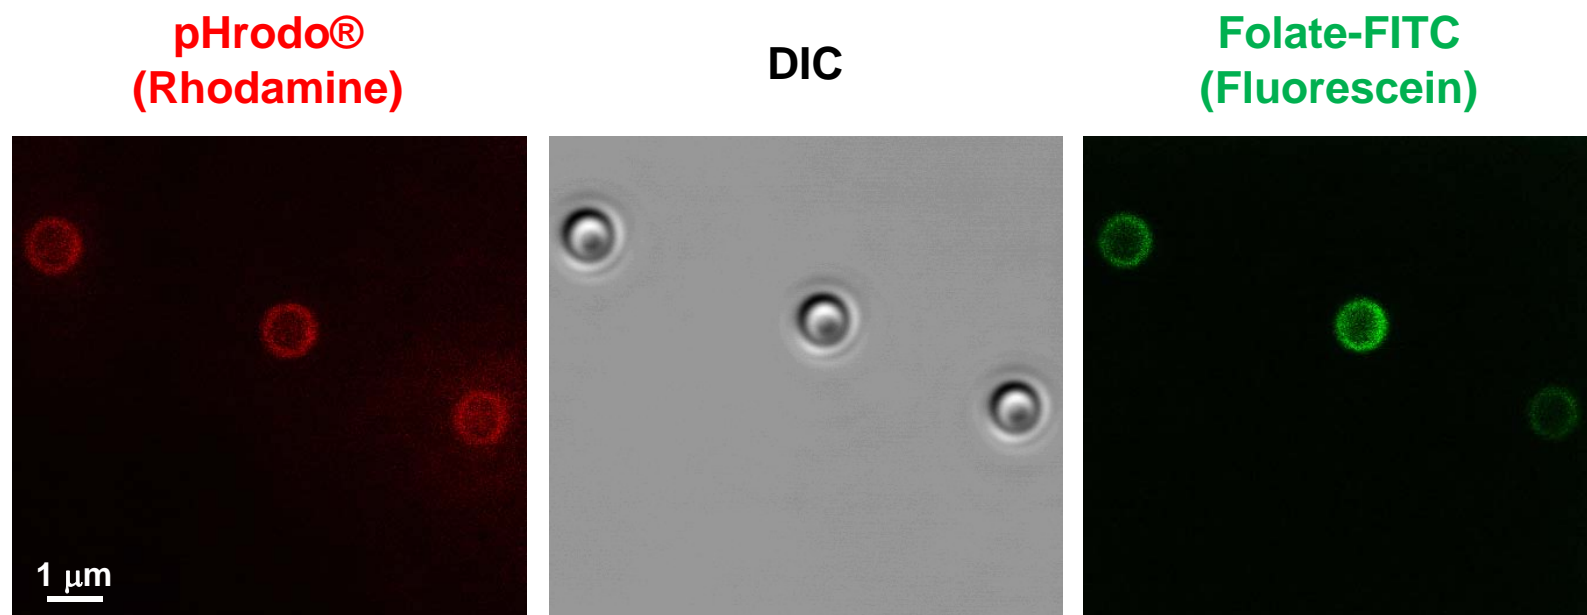

Figure 9 - Figure Supplement 2

Supplement: supp [file elife-24627-supp-v1.zip › elife_poa_e24627_Figure_9_Figure_Supplement_2.pdf]

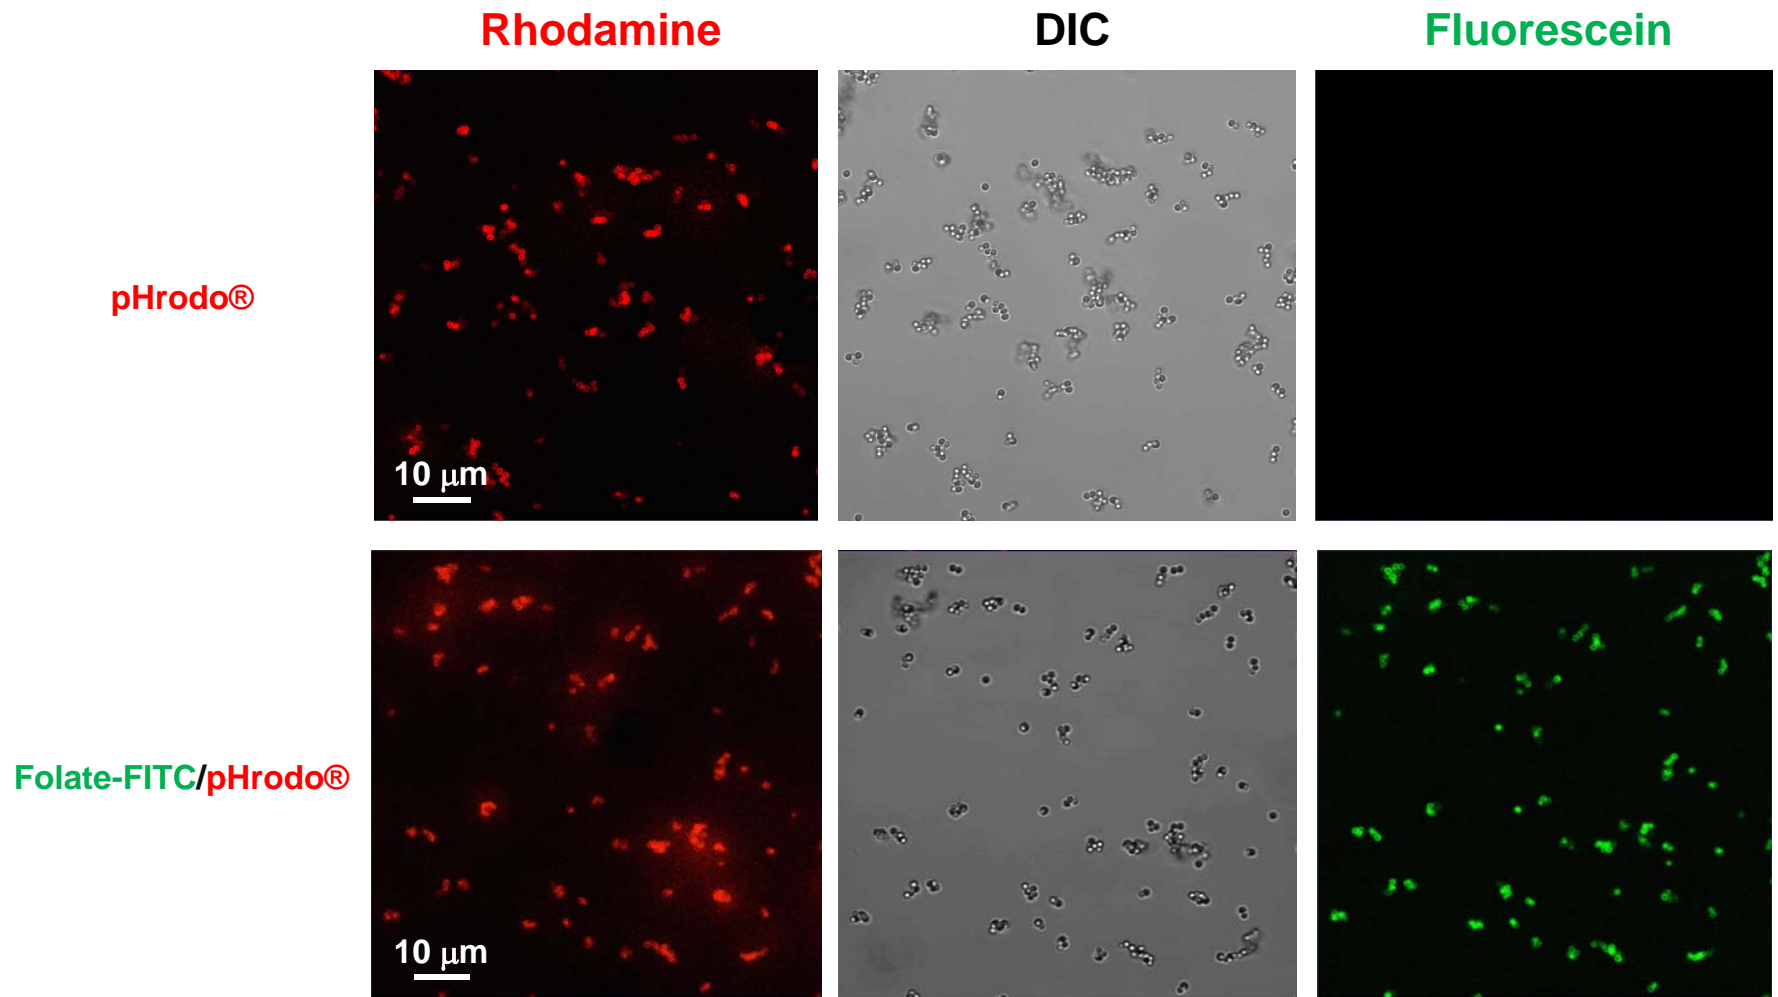

Figure 9 - Figure Supplement 1

Supplement: supp [file elife-24627-supp-v1.zip › elife_poa_e24627_Figure_9_Figure_Supplement_1.pdf]

## Folate Stimulation; Growing WT

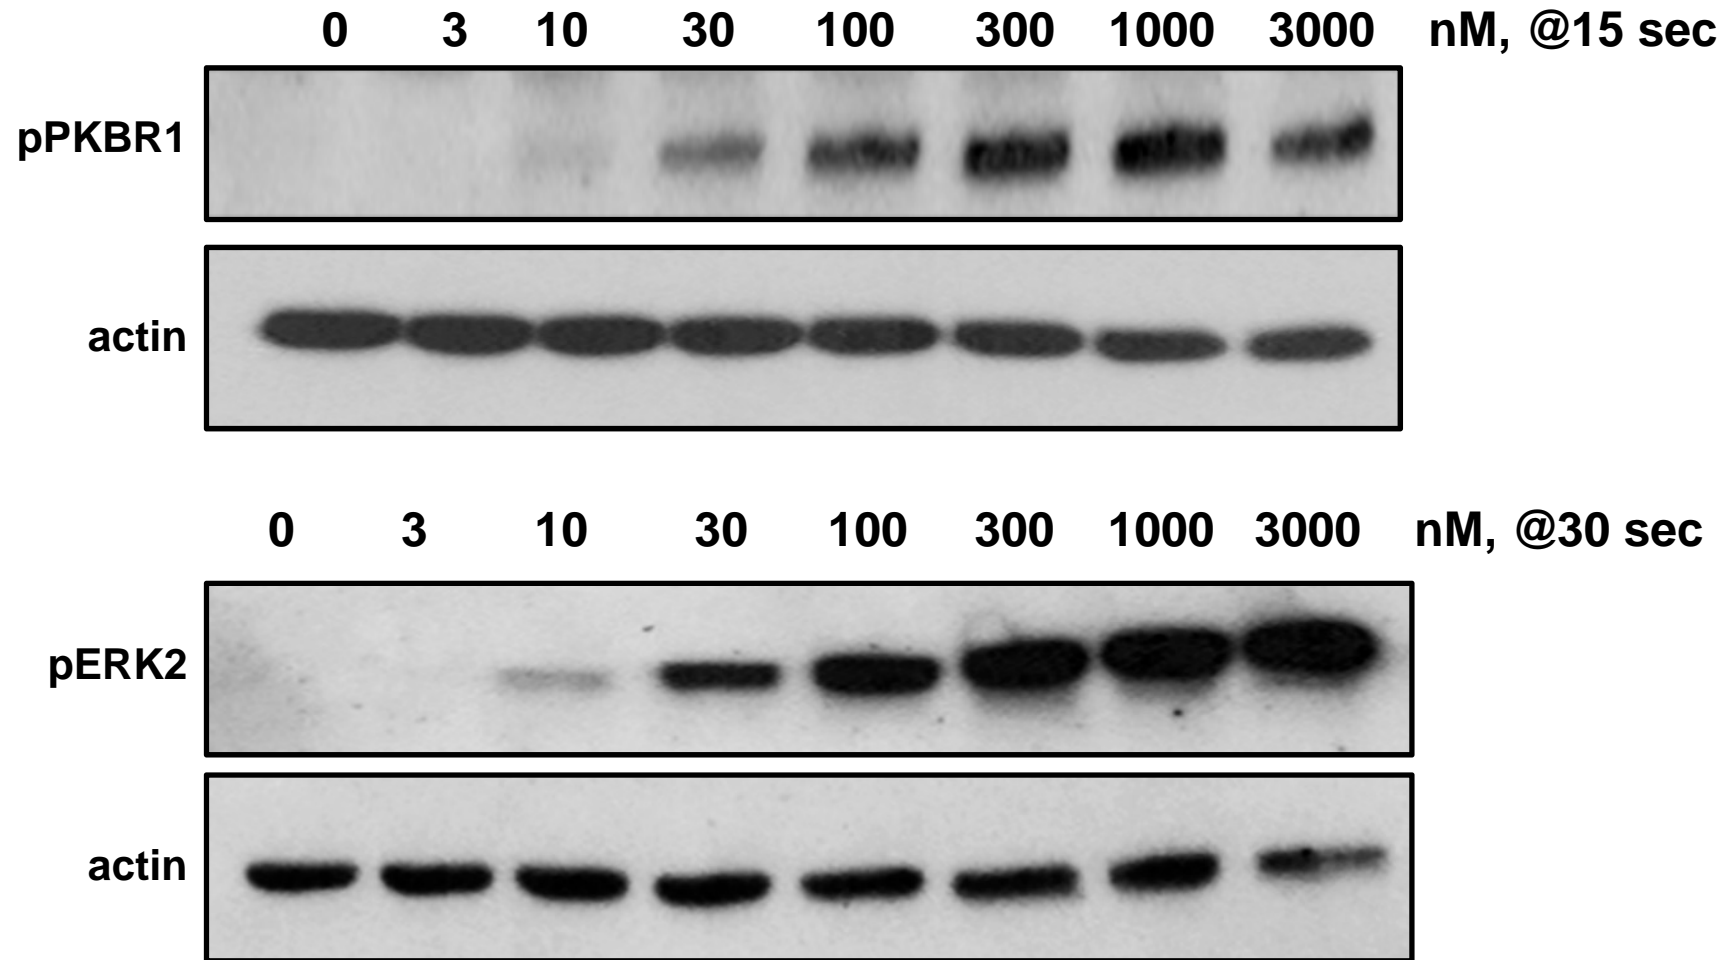

Figure 6 - Figure Supplement 1

Supplement: supp [file elife-24627-supp-v1.zip › elife_poa_e24627_Figure_6_Figure_Supplement_1.pdf]

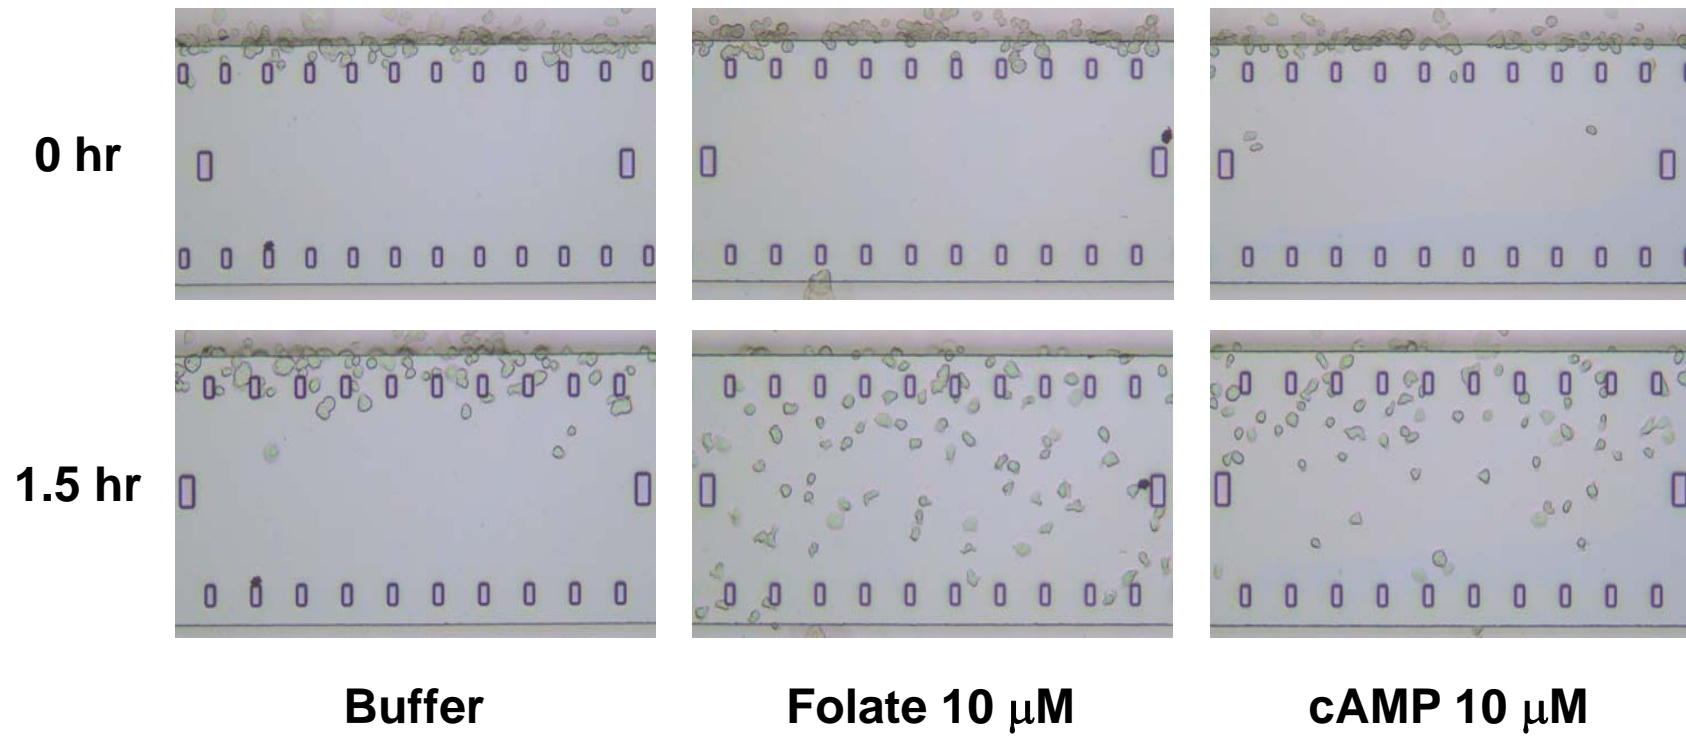

**Figures 1 - Figure Supplement 1**

Supplement: supp [file elife-24627-supp-v1.zip › elife_poa_e24627_Figure_1_Figure_supplement_1.pdf]

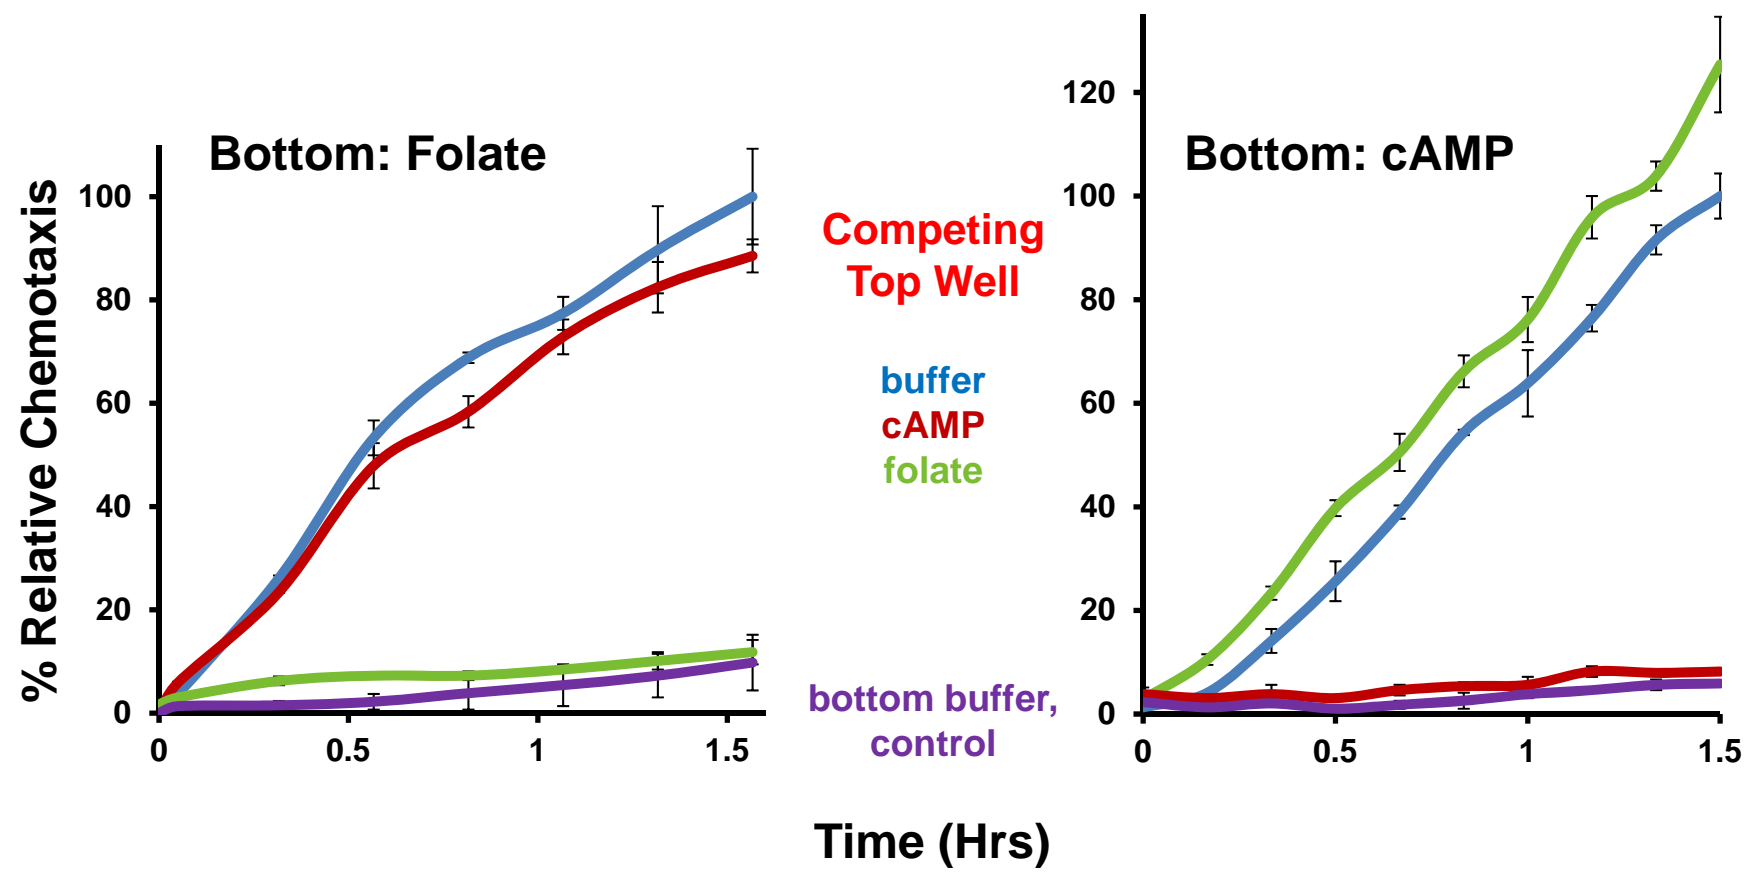

Figure 4 - Figure Supplement 2

Supplement: supp [file elife-24627-supp-v1.zip › elife_poa_e24627_Figure_4_Figure_Supplement_2.pdf]
